# Supplementary material
Source: bioRxiv or medRxiv preprint supplement (https://www.biorxiv.org/highwire/filestream/15415/field_highwire_adjunct_files/1/056069-2.pdf)
Supplement: Supplementary file [file 056069-2.pdf]

Supplementary table 2. Voxel clusters associated with the contrast of novel vs. prior knowledge proverbs.

| Region                            | BA    | Hemi. | Peak MNI coordinates |     |     | BSR  | Spatial extent (mm <sup>3</sup> ) |
|-----------------------------------|-------|-------|----------------------|-----|-----|------|-----------------------------------|
|                                   |       |       | X                    | Y   | Z   |      |                                   |
| <b>Novel &gt; Prior knowledge</b> |       |       |                      |     |     |      |                                   |
| <i>Frontal lobe</i>               |       |       |                      |     |     |      |                                   |
| Inferior frontal g.               | 45/47 | R     | 48                   | -28 | -24 | 3.34 | 3072                              |
| Inferior frontal g.               | 6/9   | L     | -36                  | -4  | 32  | 4.60 | 4864                              |
| Inferior frontal g.               | 6/9   | R     | 40                   | 0   | 28  | 3.52 | 1856                              |
| <i>Temporal lobe</i>              |       |       |                      |     |     |      |                                   |
| Inferior temporal g.              | 20    | R     | 40                   | -20 | -40 | 3.45 | 2112                              |
| Superior temporal g.              | 22    | R     | 52                   | -48 | 8   | 3.85 | 2944                              |
| Lateral temporal pole             | 38    | R     | -52                  | 8   | -44 | 4.56 | 3648                              |
| <i>Occipital lobe</i>             |       |       |                      |     |     |      |                                   |
| Occipital g.                      | 18/19 | L     | -36                  | -76 | -16 | 8.96 | 164992                            |
| Occipital g.                      | 17/18 | L     | -24                  | -80 | 20  | 8.12 |                                   |
| Occipital g.                      | 17/18 | R     | 20                   | -88 | 0   | 7.48 |                                   |
| Wernicke's area                   | 21/22 | L     | -52                  | -56 | 12  | 6.27 |                                   |
| Posterior fusiform g.             | 37    | L     | -40                  | -52 | -8  | 6.02 |                                   |
| Cerebellum                        | -     | L     | -16                  | -76 | -36 | 7.87 |                                   |
| Cerebellum                        | -     | L/R   | 12                   | -72 | -28 | 7.58 |                                   |
| <i>Subcortical and other</i>      |       |       |                      |     |     |      |                                   |
| Thalamus                          | -     | L     | -20                  | -24 | 4   | 4.70 | 2944                              |
| Thalamus                          | -     | R     | 16                   | -16 | 4   | 3.43 | 1472                              |
| <b>Prior knowledge &gt; Novel</b> |       |       |                      |     |     |      |                                   |
| <i>Frontal lobe</i>               |       |       |                      |     |     |      |                                   |
| Ventromedial prefrontal ctx.      | 10    | L/R   | -4                   | 56  | -12 | 6.20 | 6144                              |
| Medial frontal g.                 | 6     | R     | 16                   | -8  | 52  | 3.52 | 1728                              |
| <i>Parietal lobe</i>              |       |       |                      |     |     |      |                                   |
| Posterior cingulate g.            | 23/31 | L/R   | -12                  | -44 | 24  | 3.95 | 4544                              |
| Post-central g.                   | 5     | R     | 20                   | -40 | 76  | 4.00 | 2688                              |
| Angular g.                        | 39    | L     | -40                  | -58 | 40  | 3.98 | 2240                              |

Note: Coordinates are displayed in MNI space.
